# Supplementary material for: Effect of chemical composition on the electrical conductivity of gneiss at high temperatures and pressures
Source: Copernicus journal article supplement (doi:10.5194/se-9-233-2018), 2018-03-06
Supplement: Supplementary file 1 [file Supplemental data.xlsx]

## Sheet: Sheet1
623 K												673 K												723 K
Frequency	Z' (a)	Z'' (b)	Magnitude	Phase	Bias	Ampl	Time	Range	Error			Frequency	Z' (a)	Z'' (b)	Magnitude	Phase	Bias	Ampl	Time	Range	Error			Frequency	Z' (a)	Z'' (b)	Magnitude	Phase	Bias	Ampl	Time	Range	Error
10000000	2.0697	-25.025	25.11	-85.272	0	3	2.89	315	0			10000000	2.1598	-25.072	25.165	-85.076	0	3	2.89	315	0			10000000	2.1426	-25.068	25.159	-85.115	0	3	2.88	315	0
7943282	-36.824	13.155	39.103	160.34	0	3	3.88	315	0			7943282	-36.938	12.881	39.12	160.78	0	3	3.89	315	0			7943282	-36.974	12.872	39.151	160.81	0	3	3.88	315	0
6309574	-30.713	117.12	121.08	104.69	0	3	7.64	315	0			6309574	-32.906	118.74	123.22	105.49	0	3	7.64	315	0			6309574	-32.226	118.08	122.4	105.27	0	3	7.63	315	0
5011873	199	-310.15	368.5	-57.315	0	3	8.63	314	0			5011873	199.63	-307.83	366.89	-57.036	0	3	8.64	314	0			5011873	199.74	-307.5	366.68	-56.994	0	3	8.63	314	0
3981072	126.02	-449.1	466.45	-74.326	0	3	9.64	314	0			3981072	126.76	-446.69	464.33	-74.157	0	3	9.64	314	1			3981072	127.45	-446.66	464.49	-74.074	0	3	9.64	314	0
3162278	107.96	-551.35	561.82	-78.921	0	3	10.64	314	0			3162278	108.91	-548.65	559.36	-78.772	0	3	10.64	314	0			3162278	109.76	-548.69	559.56	-78.688	0	3	10.63	314	1
2511887	102.36	-675.33	683.04	-81.381	0	3	11.63	314	0			2511887	103.72	-671.93	679.89	-81.225	0	3	11.64	314	1			2511887	105	-671.84	680	-81.117	0	3	11.63	314	1
1995262	99.225	-837.31	843.17	-83.242	0	3	12.64	314	1			1995262	100.56	-833.07	839.12	-83.117	0	3	12.64	314	1			1995262	101.59	-832.82	838.99	-83.045	0	3	12.64	314	1
1584893	78.585	-1009.5	1012.6	-85.549	0	3	13.63	314	1			1584893	80.909	-1004.1	1007.4	-85.393	0	3	13.64	314	1			1584893	82.962	-1003.6	1007	-85.274	0	3	13.63	314	1
1258925	108.1	-1387.6	1391.8	-85.545	0	3	14.63	314	1			1258925	110.94	-1381.4	1385.8	-85.408	0	3	14.64	314	1			1258925	112.82	-1382.7	1387.3	-85.335	0	3	14.63	314	1
1000000	156.22	-1683.7	1690.9	-84.699	0	3	15.64	314	1			1000000	160.96	-1675.3	1683	-84.512	0	3	15.64	314	1			1000000	166.13	-1676.3	1684.5	-84.34	0	3	15.63	314	1
794328	190.89	-2082.6	2091.3	-84.763	0	3	16.76	314	1			794328	198.05	-2071.9	2081.3	-84.54	0	3	16.76	314	1			794328	206.03	-2072.3	2082.5	-84.322	0	3	16.76	314	1
630957	230.91	-2586.5	2596.8	-84.898	0	3	19.51	314	1			630957	240.31	-2571.5	2582.7	-84.661	0	3	19.51	314	1			630957	254.24	-2569.4	2581.9	-84.349	0	3	19.51	314	1
501187	284.85	-3217.5	3230.1	-84.941	0	3	20.51	313	1			501187	298.12	-3198.8	3212.7	-84.676	0	3	20.51	313	1			501187	316.48	-3195.7	3211.3	-84.344	0	3	20.51	313	1
398107	352.85	-4003	4018.5	-84.963	0	3	21.51	313	1			398107	374.91	-3976.7	3994.3	-84.614	0	3	21.51	313	1			398107	403.83	-3971.8	3992.3	-84.194	0	3	21.51	313	1
316228	452.55	-4980.2	5000.7	-84.808	0	3	22.51	313	1			316228	484.26	-4943.7	4967.4	-84.405	0	3	22.51	313	1			316228	523.92	-4935.2	4962.9	-83.94	0	3	22.51	313	1
251189	566.6	-6192.4	6218.3	-84.772	0	3	23.51	313	1			251189	610.67	-6146.5	6176.8	-84.326	0	3	23.51	313	1			251189	678.15	-6132.3	6169.7	-83.689	0	3	23.51	313	1
199526	718.55	-7706	7739.4	-84.673	0	3	24.51	313	1			199526	785.53	-7634.6	7674.9	-84.125	0	3	24.51	313	1			199526	885.05	-7608.3	7659.6	-83.365	0	3	24.51	313	1
158489	931.56	-9575.1	9620.3	-84.443	0	3	25.51	313	1			158489	1026.9	-9488.1	9543.5	-83.823	0	3	25.51	313	1			158489	1182	-9453.6	9527.2	-82.873	0	3	25.51	313	1
125892	1200.1	-11909	11969	-84.246	0	3	26.51	313	1			125892	1340.7	-11783	11859	-83.509	0	3	26.51	313	1			125892	1569.7	-11714	11819	-82.368	0	3	26.51	313	1
100000	1544.3	-14795	14875	-84.041	0	3	27.51	313	1			100000	1771.9	-14629	14736	-83.094	0	3	27.51	313	1			100000	2118.3	-14521	14675	-81.7	0	3	27.51	313	1
79432.8	2073.7	-18376	18493	-83.562	0	3	28.51	313	1			79432.8	2405.9	-18135	18294	-82.443	0	3	28.51	313	1			79432.8	2894.7	-17964	18196	-80.846	0	3	28.51	313	1
63095.7	2667.7	-22750	22906	-83.312	0	3	32.76	313	1			63095.7	3184.6	-22400	22625	-81.909	0	3	32.76	313	1			63095.7	3964.1	-22144	22496	-79.851	0	3	32.76	313	1
50118.7	3585.2	-28228	28455	-82.762	0	3	33.76	313	1			50118.7	4275.9	-27751	28078	-81.241	0	3	33.76	313	1			50118.7	5473.8	-27248	27792	-78.641	0	3	33.76	313	1
39810.7	5108.3	-35078	35448	-81.714	0	3	34.76	312	1			39810.7	6192.4	-34325	34879	-79.774	0	3	34.76	312	1			39810.7	7913.2	-33522	34443	-76.718	0	3	34.76	312	1
31622.8	6706	-43348	43864	-81.206	0	3	35.76	312	1			31622.8	8304.8	-42335	43142	-78.901	0	3	35.76	312	1			31622.8	10901	-40933	42360	-75.087	0	3	35.76	312	1
25118.9	8952.2	-53574	54317	-80.514	0	3	36.76	312	1			25118.9	11353	-52042	53266	-77.694	0	3	36.76	312	1			25118.9	15068	-49761	51992	-73.153	0	3	36.76	312	1
19952.6	11936	-66032	67102	-79.754	0	3	37.76	312	1			19952.6	15584	-63765	65642	-76.266	0	3	37.76	312	1			19952.6	20985	-59957	63523	-70.71	0	3	37.76	312	1
15848.9	16257	-81422	83029	-78.709	0	3	38.76	312	1			15848.9	21511	-77903	80818	-74.564	0	3	38.76	312	1			15848.9	28875	-71606	77209	-68.038	0	3	38.76	312	1
12589.2	22500	-99598	102110	-77.27	0	3	39.76	312	1			12589.2	29685	-94414	98971	-72.546	0	3	39.76	312	1			12589.2	40058	-84079	93134	-64.525	0	3	39.76	312	1
10000	30783	-122090	125910	-75.849	0	3	40.76	312	1			10000	41335	-113380	120680	-69.97	0	3	40.76	312	1			10000	54013	-97054	111070	-60.903	0	3	40.76	312	1
7943.28	42099	-148710	154550	-74.193	0	3	41.76	312	1			7943.28	56985	-134720	146280	-67.072	0	3	41.76	312	1			7943.28	72712	-109390	131350	-56.388	0	3	41.76	312	1
6309.57	58457	-179940	189200	-72.003	0	3	42.76	312	1			6309.57	78126	-158170	176410	-63.714	0	3	42.76	312	1			6309.57	94503	-119540	152380	-51.672	0	3	42.76	312	1
5011.87	81323	-215160	230020	-69.295	0	3	43.76	312	1			5011.87	105330	-180730	209180	-59.766	0	3	43.76	312	1			5011.87	120040	-126490	174380	-46.499	0	3	43.76	312	1
3981.07	112900	-255000	278880	-66.119	0	3	44.76	312	1			3981.07	140110	-202500	246250	-55.321	0	3	44.76	312	1			3981.07	146500	-128570	194920	-41.271	0	3	44.76	312	1
3162.28	156430	-297620	336230	-62.273	0	3	45.76	312	1			3162.28	179940	-220020	284230	-50.723	0	3	45.76	312	1			3162.28	174220	-126510	215310	-35.985	0	3	45.76	312	1
2511.89	207860	-337540	396410	-58.375	0	3	46.76	312	1			2511.89	229380	-230070	324880	-45.086	0	3	46.76	312	1			2511.89	198750	-120660	232510	-31.262	0	3	46.76	312	1
1995.26	273350	-376510	465270	-54.02	0	3	47.76	312	1			1995.26	278970	-232350	363060	-39.79	0	3	47.76	312	1			1995.26	221190	-108690	246450	-26.169	0	3	47.76	312	1
1584.89	352620	-409470	540380	-49.266	0	3	48.76	312	1			1584.89	325930	-223940	395450	-34.492	0	3	48.76	312	1			1584.89	240140	-97276	259090	-22.052	0	3	48.76	312	1
1258.92	438700	-420600	607750	-43.793	0	3	49.76	312	1			1258.92	371710	-210990	427420	-29.58	0	3	49.76	312	1			1258.92	255030	-84584	268690	-18.349	0	3	49.76	312	1
1000	527460	-421900	675440	-38.655	0	3	50.76	312	1			1000	409350	-187380	450200	-24.596	0	3	50.76	312	1			1000	266220	-70520	275400	-14.837	0	3	50.76	312	1
794.328	614390	-405720	736260	-33.439	0	3	51.76	312	1			794.328	442090	-166150	472280	-20.598	0	3	51.76	312	1			794.328	276390	-59281	282680	-12.106	0	3	51.76	312	1
630.957	694190	-373670	788370	-28.293	0	3	52.76	312	1			630.957	466020	-140590	486770	-16.788	0	3	52.76	312	1			630.957	280210	-45249	283840	-9.1731	0	3	52.76	312	1
501.187	766540	-336050	836970	-23.673	0	3	53.76	312	1			501.187	487940	-116700	501700	-13.451	0	3	53.76	312	1			501.187	284520	-35562	286730	-7.1244	0	3	53.76	312	1
398.107	809820	-285830	858780	-19.441	0	3	54.76	312	1			398.107	493850	-88875	501780	-10.202	0	3	54.76	312	1			398.107	282430	-26967	283710	-5.4542	0	3	54.76	312	1
316.228	839140	-224570	868670	-14.982	0	3	55.76	312	1			316.228	499940	-66374	504330	-7.5626	0	3	55.89	312	1			316.228	286120	-21160	286900	-4.2296	0	3	55.88	312	1
251.189	818190	-216320	846300	-14.809	0	3	58.39	312	1			251.189	504170	-91356	512380	-10.271	0	3	58.51	312	1			251.189	267100	-15470	267550	-3.3148	0	3	58.51	312	1
199.526	886950	-176250	904290	-11.239	0	3	59.38	312	1			199.526	501560	-40235	503170	-4.5864	0	3	59.51	312	1			199.526	282140	-11920	282390	-2.4192	0	3	59.51	312	1
158.489	869880	-127910	879230	-8.365	0	3	60.39	312	1			158.489	489710	-10193	489820	-1.1924	0	3	60.51	312	1			158.489	284820	-4107.6	284850	-0.82625	0	3	60.51	312	1
125.892	932150	-75922	935240	-4.6564	0	3	61.38	312	1			125.892	508810	-21043	509240	-2.3682	0	3	61.51	312	1			125.892	284060	-10776	284260	-2.1725	0	3	61.51	312	1
100	852310	-42204	853350	-2.8348	0	3	62.38	312	1			100	498630	-18889	498990	-2.1694	0	3	62.51	312	1			100	280720	-11732	280970	-2.3931	0	3	62.51	312	1
79.4328	888860	-34930	889550	-2.2504	0	3	63.39	312	1			79.4328	492270	-15528	492510	-1.8067	0	3	63.51	312	1			79.4328	284030	-13250	284340	-2.6709	0	3	63.51	312	1
63.0957	789190	-45927	790530	-3.3306	0	3	64.38	312	1			63.0957	451410	-20302	451870	-2.5751	0	3	64.51	312	1			63.0957	269450	-7173.9	269550	-1.5251	0	3	64.51	312	1
50.1187	-1332200	-1578600	2065600	-130.16	0	3	65.26	311	1			50.1187	443360	607980	752470	53.899	0	3	65.39	311	1			50.1187	260530	-170780	311520	-33.245	0	3	65.51	312	1
39.8107	880630	-8386.8	880670	-0.54565	0	3	66.26	312	1			39.8107	500830	-23126	501360	-2.6438	0	3	66.39	312	1			39.8107	284510	-12140	284770	-2.4433	0	3	66.51	312	1
31.6228	878010	-35455	878730	-2.3124	0	3	67.26	312	1			31.6228	492140	-28547	492970	-3.3198	0	3	67.39	312	1			31.6228	288340	-20918	289100	-4.1493	0	3	67.51	312	1
25.1189	898930	-44805	900050	-2.8534	0	3	68.26	312	1			25.1189	501570	-27862	502340	-3.1795	0	3	68.39	312	1			25.1189	291140	-16096	291580	-3.1644	0	3	68.51	312	1
19.9526	896010	-47820	897290	-3.055	0	3	69.26	312	1			19.9526	502380	-31041	503340	-3.5357	0	3	69.39	312	1			19.9526	293740	-18622	294330	-3.6275	0	3	69.51	312	1
15.8489	904240	14949	904360	0.94713	0	3	70.26	312	1			15.8489	513230	-12824	513390	-1.4313	0	3	70.39	312	1			15.8489	298340	-12187	298590	-2.3392	0	3	70.51	312	1
12.5892	908290	-27825	908720	-1.7547	0	3	71.26	312	1			12.5892	513460	-32339	514480	-3.6039	0	3	71.39	312	1			12.5892	299930	-21720	300720	-4.142	0	3	71.51	312	1
10	914460	-56196	916190	-3.5166	0	3	72.26	312	1			10	516780	-35067	517970	-3.882	0	3	72.39	312	1			10	303950	-21609	304720	-4.0665	0	3	72.51	312	1
7.94328	913690	-116680	921110	-7.2774	0	3	73.38	312	1			7.94328	522950	-16993	523230	-1.8611	0	3	73.51	312	1			7.94328	307390	-28614	308720	-5.3182	0	3	73.51	312	1
6.30957	934400	-65622	936700	-4.0172	0	3	74.51	312	1			6.30957	528600	-29637	529430	-3.209	0	3	74.64	312	1			6.30957	310390	-27407	311600	-5.046	0	3	74.64	312	1
5.01187	939920	-76180	943000	-4.6337	0	3	75.51	312	1			5.01187	533550	-43930	535360	-4.7068	0	3	75.64	312	1			5.01187	314690	-23536	315570	-4.2772	0	3	75.76	312	1
3.98107	949600	-44237	950630	-2.6672	0	3	76.63	312	1			3.98107	543740	-21856	544180	-2.3018	0	3	76.76	312	1			3.98107	318250	-20830	318930	-3.7448	0	3	76.88	312	1
3.16228	966040	-47013	967180	-2.7861	0	3	77.76	312	1			3.16228	545170	-49205	547390	-5.1573	0	3	77.89	312	1			3.16228	321830	-26314	322900	-4.6743	0	3	78.01	312	1
2.51189	972660	-90630	976870	-5.3233	0	3	79.26	312	1			2.51189	552420	-47532	554460	-4.9178	0	3	79.39	312	1			2.51189	326090	-25872	327110	-4.5363	0	3	79.39	312	1
1.99526	986240	-85312	989920	-4.9439	0	3	80.51	312	1			1.99526	559210	-48454	561310	-4.9522	0	3	80.64	312	1			1.99526	329710	-27219	330830	-4.7193	0	3	80.63	312	1
1.58489	980140	-98594	985090	-5.7442	0	3	81.88	312	1			1.58489	558980	-49832	561200	-5.0943	0	3	82.01	312	1			1.58489	334920	-24772	335830	-4.2301	0	3	82.01	312	1
1.25893	1014500	-94988	1018900	-5.349	0	3	83.38	312	1			1.25893	569690	-48635	571760	-4.8796	0	3	83.51	312	1			1.25893	338240	-28599	339450	-4.833	0	3	83.51	312	1
1	1025600	-99708	1030400	-5.5528	0	3	85.13	312	1			1	581510	-54137	584020	-5.3188	0	3	85.26	312	1			1	341920	-29242	343170	-4.8882	0	3	85.26	312	1
0.79433	1041100	-103000	1046200	-5.6501	0	3	87.14	312	1			0.79433	589430	-55184	592010	-5.3486	0	3	87.26	312	1			0.79433	346270	-30593	347620	-5.049	0	3	87.26	312	1
0.63096	1056900	-103720	1062000	-5.6048	0	3	90.64	312	1			0.63096	596540	-59817	599530	-5.7261	0	3	90.51	312	1			0.63096	351020	-29886	352290	-4.8665	0	3	90.88	312	1
0.50119	1074400	-106710	1079700	-5.672	0	3	93.51	312	1			0.50119	607190	-57126	609870	-5.3747	0	3	93.26	312	1			0.50119	355390	-31687	356800	-5.0951	0	3	93.63	312	1
0.39811	1086600	-111840	1092300	-5.8766	0	3	96.76	312	1			0.39811	616040	-61617	619110	-5.7118	0	3	96.51	312	1			0.39811	358400	-32102	359830	-5.1183	0	3	96.88	312	1
0.31623	1102200	-121580	1108900	-6.2947	0	3	100.63	312	1			0.31623	623080	-64712	626430	-5.9294	0	3	100.51	312	1			0.31623	364000	-34167	365600	-5.3624	0	3	100.76	312	1
0.25119	1118800	-123710	1125600	-6.3098	0	3	105.38	312	1			0.25119	631000	-64750	634310	-5.8589	0	3	105.26	312	1			0.25119	367410	-34426	369020	-5.3529	0	3	105.51	312	1
0.19953	1132400	-133260	1140200	-6.7117	0	3	111.14	312	1			0.19953	638950	-67973	642560	-6.0724	0	3	111.01	312	1			0.19953	373500	-36238	375250	-5.5416	0	3	111.26	312	1
0.15849	1146500	-136460	1154600	-6.7876	0	3	118.26	312	1			0.15849	645470	-70116	649270	-6.1996	0	3	118.14	312	1			0.15849	377710	-38118	379630	-5.7627	0	3	118.38	312	1
0.12589	1162600	-138010	1170800	-6.7698	0	3	127.01	312	1			0.12589	655670	-72080	659620	-6.2735	0	3	126.76	312	1			0.12589	383430	-38942	385400	-5.7992	0	3	127.13	312	1
0.1	1187700	-147590	1196800	-7.0836	0	3	137.76	312	1			0.1	668200	-75096	672410	-6.4123	0	3	137.51	312	1			0.1	389400	-40186	391470	-5.8921	0	3	137.88	312	1
773 K												823 K												873 K
Frequency	Z' (a)	Z'' (b)	Magnitude	Phase	Bias	Ampl	Time	Range	Error			Frequency	Z' (a)	Z'' (b)	Magnitude	Phase	Bias	Ampl	Time	Range	Error			Frequency	Z' (a)	Z'' (b)	Magnitude	Phase	Bias	Ampl	Time	Range	Error
10000000	2.2438	-25.016	25.116	-84.875	0	3	2.89	315	0			10000000	2.257	-24.548	24.652	-84.747	0	3	2.89	315	0			10000000	2.3771	-24.624	24.738	-84.486	0	3	2.88	315	0
7943282	-36.999	12.564	39.074	161.24	0	3	3.89	315	0			7943282	-39.381	12.557	41.335	162.31	0	3	3.88	315	0			7943282	-39.591	12.098	41.398	163.01	0	3	3.88	315	0
6309574	-33.604	118.1	122.79	105.88	0	3	7.64	315	0			6309574	-36.362	122.29	127.58	106.56	0	3	7.64	315	0			6309574	-38.498	121.86	127.8	107.53	0	3	7.63	315	0
5011873	201.41	-305.64	366.04	-56.616	0	3	8.64	314	0			5011873	203.58	-304.93	366.64	-56.272	0	3	8.63	314	0			5011873	206.45	-301.22	365.18	-55.574	0	3	8.63	314	0
3981072	129.43	-445.39	463.82	-73.796	0	3	9.64	314	0			3981072	132.1	-444.62	463.83	-73.453	0	3	9.64	314	0			3981072	135.63	-442.32	462.65	-72.953	0	3	9.64	314	0
3162278	111.59	-546.99	558.26	-78.469	0	3	10.64	314	1			3162278	114.83	-544.58	556.55	-78.093	0	3	10.64	314	0			3162278	119.12	-542.13	555.06	-77.608	0	3	10.63	314	0
2511887	107.51	-669.46	678.04	-80.877	0	3	11.64	314	1			2511887	111.25	-665.75	674.98	-80.513	0	3	11.63	314	1			2511887	117.29	-662.24	672.55	-79.956	0	3	11.63	314	1
1995262	104	-829.71	836.2	-82.856	0	3	12.64	314	1			1995262	105.86	-822.84	829.62	-82.669	0	3	12.64	314	1			1995262	112.75	-817.62	825.36	-82.148	0	3	12.63	314	1
1584893	87.038	-1000	1003.8	-85.026	0	3	13.64	314	1			1584893	65.644	-1004.1	1006.2	-86.26	0	3	13.64	314	0			1584893	73.914	-996.05	998.79	-85.756	0	3	13.63	314	1
1258925	116.29	-1378.1	1383	-85.177	0	3	14.63	314	1			1258925	130.54	-1364.1	1370.3	-84.534	0	3	14.63	314	1			1258925	144.94	-1358.2	1365.9	-83.909	0	3	14.63	314	1
1000000	174.36	-1670.6	1679.7	-84.042	0	3	15.76	314	1			1000000	188.38	-1663.6	1674.2	-83.54	0	3	15.76	314	1			1000000	211.46	-1654.1	1667.6	-82.715	0	3	15.63	314	1
794328	219.47	-2064.5	2076.1	-83.932	0	3	16.89	314	1			794328	240.91	-2055.9	2070	-83.317	0	3	16.89	314	1			794328	276.4	-2041.1	2059.7	-82.288	0	3	16.76	314	1
630957	273.86	-2559.5	2574.1	-83.893	0	3	19.76	314	1			630957	306.09	-2545.9	2564.2	-83.144	0	3	19.63	314	1			630957	360.41	-2524.4	2550	-81.875	0	3	19.63	314	1
501187	347.19	-3180	3198.9	-83.769	0	3	20.76	313	1			501187	398.34	-3161.3	3186.3	-82.818	0	3	20.64	313	1			501187	480.08	-3127.5	3164.1	-81.273	0	3	20.63	313	1
398107	450.22	-3947.7	3973.3	-83.494	0	3	21.76	313	1			398107	527.23	-3917.3	3952.6	-82.335	0	3	21.64	313	1			398107	648.72	-3866.2	3920.2	-80.475	0	3	21.63	313	1
316228	594.88	-4899.2	4935.2	-83.077	0	3	22.76	313	1			316228	713.9	-4853.3	4905.5	-81.632	0	3	22.63	313	1			316228	894.12	-4769.2	4852.3	-79.382	0	3	22.63	313	1
251189	783.89	-6081	6131.3	-82.655	0	3	23.76	313	1			251189	957.76	-6007.1	6083	-80.941	0	3	23.64	313	1			251189	1229.4	-5874.8	6002.1	-78.18	0	3	23.63	313	1
199526	1044.8	-7541.2	7613.2	-82.112	0	3	24.76	313	1			199526	1314.6	-7418.9	7534.5	-79.952	0	3	24.63	313	1			199526	1702.5	-7208.6	7406.9	-76.712	0	3	24.63	313	1
158489	1420.7	-9333	9440.5	-81.345	0	3	25.76	313	1			158489	1807.8	-9148.7	9325.6	-78.822	0	3	25.63	313	1			158489	2404.8	-8792.5	9115.4	-74.703	0	3	25.63	313	1
125892	1926.7	-11538	11698	-80.52	0	3	26.76	313	1			125892	2506.7	-11236	11512	-77.424	0	3	26.64	313	1			125892	3374.2	-10660	11181	-72.436	0	3	26.63	313	1
100000	2642.9	-14253	14496	-79.495	0	3	27.76	313	1			100000	3517.3	-13752	14195	-75.653	0	3	27.63	313	1			100000	4715.5	-12805	13646	-69.784	0	3	27.63	313	1
79432.8	3696.4	-17532	17917	-78.094	0	3	28.76	313	1			79432.8	4962.3	-16734	17454	-73.483	0	3	28.64	313	1			79432.8	6613.6	-15167	16546	-66.44	0	3	28.64	313	1
63095.7	5115	-21461	22062	-76.594	0	3	33.01	313	1			63095.7	6908.6	-20134	21286	-71.061	0	3	32.89	313	1			63095.7	9100.2	-17636	19845	-62.706	0	3	32.88	313	1
50118.7	7137.7	-26181	27137	-74.75	0	3	34.01	313	1			50118.7	9649.1	-24016	25882	-68.111	0	3	33.88	313	1			50118.7	12331	-20068	23554	-58.431	0	3	33.88	313	1
39810.7	10387	-31759	33414	-71.889	0	3	35.01	312	1			39810.7	13362	-28201	31206	-64.648	0	3	35.01	313	1			39810.7	16323	-22197	27553	-53.67	0	3	34.88	313	1
31622.8	14407	-38063	40698	-69.268	0	3	36.01	312	1			31622.8	18590	-32477	37421	-60.213	0	3	36.01	312	1			31622.8	20985	-23754	31696	-48.542	0	3	36.01	313	1
25118.9	19865	-45165	49341	-66.259	0	3	37.01	312	1			25118.9	24860	-36497	44159	-55.739	0	3	37.01	312	1			25118.9	26360	-24462	35962	-42.861	0	3	37.01	312	1
19952.6	27136	-52607	59193	-62.714	0	3	38.01	312	1			19952.6	32273	-39885	51307	-51.022	0	3	38.01	312	1			19952.6	31611	-24227	39827	-37.467	0	3	38.01	312	1
15848.9	36685	-59982	70311	-58.55	0	3	39.01	312	1			15848.9	40694	-41892	58403	-45.831	0	3	39.01	312	1			15848.9	36583	-23224	43332	-32.409	0	3	39.01	312	1
12589.2	48359	-66745	82423	-54.075	0	3	40.01	312	1			12589.2	49623	-42546	65365	-40.609	0	3	40.01	312	1			12589.2	41108	-21313	46305	-27.405	0	3	40.01	312	1
10000	62080	-71504	94693	-49.035	0	3	41.01	312	1			10000	58604	-41493	71806	-35.299	0	3	41.01	312	1			10000	44740	-18950	48588	-22.955	0	3	41.01	312	1
7943.28	77630	-74524	107610	-43.831	0	3	42.01	312	1			7943.28	66755	-39110	77368	-30.365	0	3	42.01	312	1			7943.28	47816	-16379	50543	-18.908	0	3	42.01	312	1
6309.57	93564	-74270	119460	-38.442	0	3	43.01	312	1			6309.57	73899	-35328	81909	-25.55	0	3	43.01	312	1			6309.57	50174	-13707	52013	-15.28	0	3	43.01	312	1
5011.87	108270	-71431	129710	-33.415	0	3	44.01	312	1			5011.87	79759	-31403	85718	-21.491	0	3	44.01	312	1			5011.87	51810	-11038	52973	-12.027	0	3	44.01	312	1
3981.07	122240	-66472	139140	-28.537	0	3	45.01	312	1			3981.07	84798	-26898	88962	-17.599	0	3	45.01	312	1			3981.07	52885	-8759.8	53606	-9.405	0	3	45.01	312	1
3162.28	134360	-59871	147100	-24.018	0	3	46.01	312	1			3162.28	88413	-22292	91180	-14.151	0	3	46.01	312	1			3162.28	53423	-6552.9	53823	-6.993	0	3	46.01	312	1
2511.89	143570	-52320	152810	-20.023	0	3	47.01	312	1			2511.89	90825	-18481	92686	-11.501	0	3	47.01	312	1			2511.89	53611	-4871.1	53832	-5.1916	0	3	47.01	312	1
1995.26	151760	-44976	158280	-16.508	0	3	48.01	312	1			1995.26	92584	-14660	93737	-8.9977	0	3	48.01	312	1			1995.26	53434	-3298.9	53536	-3.5328	0	3	48.01	312	1
1584.89	157360	-37597	161790	-13.437	0	3	49.01	312	1			1584.89	93368	-11255	94044	-6.8735	0	3	49.01	312	1			1584.89	53171	-2495.9	53230	-2.6875	0	3	49.01	312	1
1258.92	161720	-30289	164530	-10.608	0	3	50.01	312	1			1258.92	93955	-8418.2	94331	-5.1199	0	3	50.01	312	1			1258.92	52921	-1884	52955	-2.0389	0	3	50.01	312	1
1000	163800	-24178	165570	-8.3966	0	3	51.01	312	1			1000	93737	-6160.2	93939	-3.76	0	3	51.01	312	1			1000	52613	-1534.5	52635	-1.6706	0	3	51.01	312	1
794.328	166310	-18386	167320	-6.3086	0	3	52.01	312	1			794.328	93562	-4674.1	93679	-2.86	0	3	52.01	312	1			794.328	52430	-1489	52451	-1.6267	0	3	52.01	312	1
630.957	166080	-14045	166670	-4.8339	0	3	53.01	312	1			630.957	92785	-3688.6	92858	-2.2766	0	3	53.01	312	1			630.957	52301	-1531	52323	-1.6767	0	3	53.01	312	1
501.187	164820	-10862	165180	-3.7705	0	3	54.01	312	1			501.187	92820	-3302.5	92879	-2.0377	0	3	54.01	312	1			501.187	52355	-1729.5	52384	-1.892	0	3	54.01	312	1
398.107	165440	-8298.4	165650	-2.8715	0	3	55.01	312	1			398.107	92568	-3249.1	92625	-2.0102	0	3	55.01	312	1			398.107	52625	-1799.7	52656	-1.9587	0	3	55.01	312	1
316.228	165480	-7130.6	165630	-2.4674	0	3	56.01	312	1			316.228	92550	-3487.6	92616	-2.1581	0	3	56.13	312	1			316.228	52750	-1964.1	52787	-2.1324	0	3	56.13	312	1
251.189	158910	-9516.5	159190	-3.4271	0	3	58.64	312	1			251.189	94484	-5234.6	94629	-3.1711	0	3	58.76	312	1			251.189	53430	-1566.2	53453	-1.679	0	3	58.76	312	1
199.526	164500	-6618	164630	-2.3038	0	3	59.64	312	1			199.526	93490	-4003.2	93576	-2.4519	0	3	59.76	312	1			199.526	53450	-2353.5	53502	-2.5212	0	3	59.76	312	1
158.489	163400	-9423.3	163670	-3.3006	0	3	60.63	312	1			158.489	95031	-4380.2	95132	-2.639	0	3	60.76	312	1			158.489	54139	-2692.3	54206	-2.8469	0	3	60.76	312	1
125.892	165590	-7608.3	165760	-2.6307	0	3	61.64	312	1			125.892	94242	-4603.6	94354	-2.7966	0	3	61.76	312	1			125.892	54284	-2691.4	54351	-2.8384	0	3	61.76	312	1
100	166140	-7644	166320	-2.6343	0	3	62.64	312	1			100	95267	-4916.4	95394	-2.9542	0	3	62.76	312	1			100	54644	-2715.6	54711	-2.845	0	3	62.76	312	1
79.4328	166310	-8301.9	166520	-2.8577	0	3	63.64	312	1			79.4328	96263	-5016.6	96394	-2.9832	0	3	63.76	312	1			79.4328	55141	-2827.5	55213	-2.9354	0	3	63.76	312	1
63.0957	169860	-13144	170370	-4.4248	0	3	64.64	312	1			63.0957	96789	-6822.7	97029	-4.0321	0	3	64.76	312	1			63.0957	55570	-3485.8	55679	-3.5894	0	3	64.76	312	1
50.1187	246630	-3282	246650	-0.76241	0	3	65.63	312	1			50.1187	118870	-3512.3	118920	-1.6924	0	3	65.76	312	1			50.1187	61212	-7022.8	61614	-6.5449	0	3	65.76	312	1
39.8107	170700	-9033.2	170940	-3.0292	0	3	66.64	312	1			39.8107	98088	-5533.3	98244	-3.2287	0	3	66.76	312	1			39.8107	56660	-3139.3	56747	-3.1713	0	3	66.76	312	1
31.6228	172070	-10643	172400	-3.5394	0	3	67.64	312	1			31.6228	99088	-6145.8	99278	-3.5491	0	3	67.76	312	1			31.6228	57144	-3206.2	57234	-3.2113	0	3	67.76	312	1
25.1189	174250	-12164	174670	-3.9932	0	3	68.63	312	1			25.1189	100360	-6329.4	100560	-3.6087	0	3	68.76	312	1			25.1189	57640	-3455.8	57744	-3.4311	0	3	68.76	312	1
19.9526	175930	-11571	176310	-3.763	0	3	69.64	312	1			19.9526	101240	-6554.5	101450	-3.7043	0	3	69.76	312	1			19.9526	58239	-3556.8	58348	-3.4949	0	3	69.76	312	1
15.8489	178480	-13731	179010	-4.3993	0	3	70.64	312	1			15.8489	102660	-6177.5	102850	-3.4436	0	3	70.76	312	1			15.8489	58814	-3366.9	58910	-3.2764	0	3	70.76	312	1
12.5892	179820	-13488	180330	-4.2896	0	3	71.64	312	1			12.5892	103450	-6865.1	103680	-3.7967	0	3	71.76	312	1			12.5892	59403	-3784.5	59523	-3.6453	0	3	71.76	312	1
10	181840	-12802	182290	-4.0271	0	3	72.64	312	1			10	104490	-7114.4	104730	-3.8951	0	3	72.76	312	1			10	59954	-3896.7	60080	-3.7187	0	3	72.76	312	1
7.94328	184270	-14424	184830	-4.4758	0	3	73.76	312	1			7.94328	105850	-6575.1	106050	-3.5545	0	3	73.88	312	1			7.94328	60501	-4142.6	60643	-3.917	0	3	73.76	312	1
6.30957	186040	-14314	186590	-4.3997	0	3	74.89	312	1			6.30957	106810	-7447.7	107070	-3.9887	0	3	74.89	312	1			6.30957	61168	-4243.2	61315	-3.9682	0	3	74.89	312	1
5.01187	188340	-13410	188820	-4.0726	0	3	75.89	312	1			5.01187	107970	-7703.8	108240	-4.0812	0	3	75.89	312	1			5.01187	61806	-4245.8	61952	-3.9298	0	3	75.88	312	1
3.98107	190140	-14535	190690	-4.3714	0	3	77.01	312	1			3.98107	108940	-8377.4	109260	-4.3973	0	3	76.88	312	1			3.98107	62490	-4023.1	62619	-3.6836	0	3	76.88	312	1
3.16228	192370	-16368	193070	-4.8634	0	3	78.13	312	1			3.16228	110180	-8512.4	110510	-4.4178	0	3	78.01	312	1			3.16228	63109	-4365.8	63260	-3.9573	0	3	78.13	312	1
2.51189	194650	-15240	195250	-4.4768	0	3	79.64	312	1			2.51189	111350	-8350	111660	-4.2885	0	3	79.14	312	1			2.51189	63738	-4600.6	63904	-4.1284	0	3	79.51	312	1
1.99526	196840	-15590	197460	-4.5285	0	3	80.89	312	1			1.99526	112690	-8524.1	113010	-4.3257	0	3	80.39	312	1			1.99526	64405	-4729.9	64578	-4.2003	0	3	80.76	312	1
1.58489	200240	-16307	200900	-4.6557	0	3	82.26	312	1			1.58489	113570	-9068.2	113930	-4.5652	0	3	81.76	312	1			1.58489	64999	-4950.4	65187	-4.3553	0	3	82.13	312	1
1.25893	201760	-17104	202480	-4.8456	0	3	83.76	312	1			1.25893	115060	-9077.9	115420	-4.5111	0	3	83.26	312	1			1.25893	65676	-5054.8	65870	-4.4011	0	3	83.63	312	1
1	203500	-16910	204200	-4.7501	0	3	85.51	312	1			1	116460	-9222.1	116820	-4.5276	0	3	85.01	312	1			1	66486	-5146.2	66685	-4.426	0	3	85.38	312	1
0.79433	206110	-17072	206820	-4.735	0	3	87.51	312	1			0.79433	117750	-9559.1	118140	-4.6412	0	3	87.01	312	1			0.79433	67149	-5321.6	67360	-4.5313	0	3	87.38	312	1
0.63096	208660	-17412	209390	-4.7701	0	3	90.76	312	1			0.63096	118990	-9925.8	119400	-4.7684	0	3	90.51	312	1			0.63096	67846	-5406.6	68061	-4.5562	0	3	90.88	312	1
0.50119	211650	-18360	212440	-4.9578	0	3	93.51	312	1			0.50119	120580	-9982.3	120990	-4.7325	0	3	93.26	312	1			0.50119	68716	-5521.1	68937	-4.5937	0	3	93.63	312	1
0.39811	214290	-18592	215100	-4.9586	0	3	96.76	312	1			0.39811	121820	-10206	122250	-4.789	0	3	96.51	312	1			0.39811	69448	-5717.3	69683	-4.7063	0	3	96.88	312	1
0.31623	216930	-19411	217800	-5.1132	0	3	100.63	312	1			0.31623	123480	-10753	123950	-4.9769	0	3	100.39	312	1			0.31623	70472	-6060.8	70732	-4.9155	0	3	100.76	312	1
0.25119	219240	-19597	220110	-5.1079	0	3	105.38	312	1			0.25119	124990	-10862	125460	-4.9667	0	3	105.14	312	1			0.25119	71338	-6140.5	71602	-4.9197	0	3	105.51	312	1
0.19953	222040	-20558	222990	-5.2898	0	3	111.14	312	1			0.19953	127090	-11448	127600	-5.1472	0	3	110.89	312	1			0.19953	72411	-6412.4	72694	-5.0607	0	3	111.26	312	1
0.15849	224190	-21284	225200	-5.4233	0	3	118.26	312	1			0.15849	128880	-11913	129430	-5.2811	0	3	118.01	312	1			0.15849	73179	-6742.5	73489	-5.2642	0	3	118.38	312	1
0.12589	227200	-21580	228220	-5.4258	0	3	127.01	312	1			0.12589	130790	-12200	131360	-5.3291	0	3	126.76	312	1			0.12589	74103	-6859.2	74420	-5.2884	0	3	127.13	312	1
0.1	231610	-22501	232700	-5.5489	0	3	137.76	312	1			0.1	132720	-12495	133310	-5.3783	0	3	137.51	312	1			0.1	75211	-7062.9	75542	-5.3648	0	3	137.88	312	1
923 K												973 K												1023 K
Frequency	Z' (a)	Z'' (b)	Magnitude	Phase	Bias	Ampl	Time	Range	Error			Frequency	Z' (a)	Z'' (b)	Magnitude	Phase	Bias	Ampl	Time	Range	Error			Frequency	Z' (a)	Z'' (b)	Magnitude	Phase	Bias	Ampl	Time	Range	Error
10000000	2.5609	-24.454	24.588	-84.022	0	3	2.89	315	0			10000000	2.62	-24.529	24.669	-83.903	0	3	2.89	315	0			10000000	2.6266	-24.604	24.744	-83.906	0	3	2.88	315	0
7943282	-41.04	11.267	42.559	164.65	0	3	3.89	315	0			7943282	-41.178	11.067	42.639	164.96	0	3	3.89	315	0			7943282	-41.421	10.975	42.85	165.16	0	3	3.88	315	0
6309574	-41.752	122.32	129.25	108.85	0	3	7.64	315	0			6309574	-42.703	122.12	129.37	109.27	0	3	7.64	315	0			6309574	-42.708	121.73	129	109.33	0	3	7.63	315	0
5011873	210.2	-296.79	363.69	-54.692	0	3	8.64	314	0			5011873	213.57	-292.04	361.8	-53.822	0	3	8.64	314	0			5011873	217.01	-286.93	359.75	-52.899	0	3	8.63	314	0
3981072	140.55	-439.23	461.17	-72.256	0	3	9.64	314	1			3981072	145.61	-436.19	459.85	-71.54	0	3	9.64	314	0			3981072	151.47	-432.84	458.58	-70.713	0	3	9.63	314	0
3162278	125.48	-538.7	553.12	-76.888	0	3	10.64	314	1			3162278	131.92	-535.54	551.55	-76.162	0	3	10.64	314	0			3162278	139.65	-532.22	550.24	-75.298	0	3	10.63	314	0
2511887	126.31	-657.35	669.38	-79.123	0	3	11.64	314	1			2511887	135.53	-653	666.92	-78.275	0	3	11.64	314	0			2511887	146.67	-648.44	664.82	-77.255	0	3	11.63	314	1
1995262	124.31	-809.61	819.1	-81.271	0	3	12.64	314	1			1995262	135.69	-802.99	814.37	-80.409	0	3	12.64	314	0			1995262	149.72	-795.51	809.48	-79.341	0	3	12.63	314	1
1584893	79.106	-977.61	980.81	-85.374	0	3	13.64	314	0			1584893	96.369	-968.8	973.58	-84.319	0	3	13.64	314	0			1584893	117.76	-959.67	966.87	-83.004	0	3	13.63	314	1
1258925	171.78	-1349.9	1360.8	-82.748	0	3	14.64	314	1			1258925	196.73	-1341.1	1355.5	-81.655	0	3	14.64	314	1			1258925	227.4	-1330.5	1349.8	-80.301	0	3	14.63	314	1
1000000	248.85	-1638.6	1657.4	-81.365	0	3	15.64	314	1			1000000	289.2	-1624.3	1649.8	-79.905	0	3	15.64	314	1			1000000	338.9	-1605.9	1641.3	-78.083	0	3	15.76	314	1
794328	332.72	-2018.4	2045.6	-80.639	0	3	16.76	314	1			794328	393.49	-1994.6	2033	-78.84	0	3	16.76	314	1			794328	469.01	-1961.9	2017.2	-76.555	0	3	16.88	314	1
630957	444.68	-2485.8	2525.3	-79.858	0	3	19.51	314	1			630957	537.58	-2446.9	2505.3	-77.609	0	3	19.51	314	1			630957	650.89	-2389.8	2476.9	-74.764	0	3	19.63	314	1
501187	605.6	-3070.1	3129.3	-78.841	0	3	20.51	313	1			501187	744.41	-3000.2	3091.2	-76.065	0	3	20.51	313	1			501187	904.81	-2908	3045.5	-72.717	0	3	20.63	313	1
398107	838.76	-3771.4	3863.5	-77.461	0	3	21.51	313	1			398107	1043.5	-3656.8	3802.8	-74.073	0	3	21.51	313	1			398107	1277.1	-3496.5	3722.4	-69.935	0	3	21.63	313	1
316228	1174.9	-4618.4	4765.5	-75.727	0	3	22.51	313	1			316228	1471.3	-4423.9	4662.1	-71.604	0	3	22.51	313	1			316228	1792.2	-4150.1	4520.5	-66.643	0	3	22.63	313	1
251189	1643.2	-5622	5857.2	-73.707	0	3	23.51	313	1			251189	2059	-5295.5	5681.7	-68.753	0	3	23.51	313	1			251189	2481.9	-4840.1	5439.3	-62.852	0	3	23.63	313	1
199526	2306.3	-6791.4	7172.3	-71.243	0	3	24.51	313	1			199526	2874	-6246.3	6875.8	-65.292	0	3	24.51	313	1			199526	3388.2	-5515.6	6473.2	-58.438	0	3	24.63	313	1
158489	3234.1	-8113.3	8734.1	-68.267	0	3	25.51	313	1			158489	3960.4	-7232.5	8245.8	-61.296	0	3	25.51	313	1			158489	4516	-6103.3	7592.4	-53.501	0	3	25.63	313	1
125892	4482.1	-9545.5	10545	-64.848	0	3	26.51	313	1			125892	5333.4	-8149.5	9739.6	-56.797	0	3	26.51	313	1			125892	5827.2	-6511.7	8738.3	-48.175	0	3	26.63	313	1
100000	6161.5	-11018	12624	-60.785	0	3	27.51	313	1			100000	7047.1	-8917.1	11366	-51.681	0	3	27.51	313	1			100000	7266.7	-6671.4	9864.7	-42.554	0	3	27.63	313	1
79432.8	8315.7	-12352	14890	-56.05	0	3	28.51	313	1			79432.8	9001.2	-9379.6	13000	-46.179	0	3	28.51	313	1			79432.8	8740	-6539.2	10916	-36.804	0	3	28.63	313	1
63095.7	10847	-13447	17277	-51.109	0	3	32.76	313	1			63095.7	11025	-9480.8	14541	-40.693	0	3	32.76	313	1			63095.7	10081	-6133.4	11800	-31.317	0	3	32.88	313	1
50118.7	13744	-14125	19708	-45.783	0	3	33.76	313	1			50118.7	13053	-9191.8	15965	-35.153	0	3	33.76	313	1			50118.7	11269	-5531.2	12553	-26.143	0	3	33.88	313	1
39810.7	16770	-14271	22020	-40.397	0	3	34.76	313	1			39810.7	14889	-8582.4	17185	-29.96	0	3	34.76	313	1			39810.7	12196	-4834.2	13119	-21.622	0	3	34.88	313	1
31622.8	19806	-13832	24158	-34.929	0	3	35.76	313	1			31622.8	16509	-7703.1	18218	-25.014	0	3	35.76	313	1			31622.8	12957	-4049.1	13575	-17.354	0	3	35.88	313	1
25118.9	22596	-12864	26001	-29.653	0	3	36.76	313	1			25118.9	17824	-6663.3	19029	-20.498	0	3	36.76	313	1			25118.9	13507	-3268.6	13897	-13.604	0	3	36.88	313	1
19952.6	24960	-11558	27506	-24.847	0	3	37.76	313	1			19952.6	18817	-5585.1	19628	-16.531	0	3	37.76	313	1			19952.6	13843	-2534.9	14073	-10.377	0	3	37.88	313	1
15848.9	26912	-10024	28718	-20.429	0	3	38.76	313	1			15848.9	19533	-4483.8	20041	-12.928	0	3	38.76	313	1			15848.9	14035	-1872.6	14159	-7.5997	0	3	38.88	313	1
12589.2	28403	-8410.2	29622	-16.494	0	3	39.76	313	1			12589.2	19970	-3464.9	20268	-9.8431	0	3	39.76	313	1			12589.2	14082	-1299	14142	-5.2704	0	3	39.88	313	1
10000	29522	-6826.3	30301	-13.02	0	3	40.76	313	1			10000	20190	-2548	20350	-7.1928	0	3	40.76	313	1			10000	14042	-818.88	14066	-3.3375	0	3	40.88	313	1
7943.28	30206	-5361.9	30678	-10.066	0	3	41.76	313	1			7943.28	20225	-1784.4	20304	-5.042	0	3	41.76	313	1			7943.28	13924	-507.3	13933	-2.0866	0	3	41.88	313	1
6309.57	30583	-4014.3	30845	-7.4778	0	3	42.76	313	1			6309.57	20141	-1185.7	20176	-3.3691	0	3	42.76	313	1			6309.57	13766	-287.89	13769	-1.1981	0	3	42.88	313	1
5011.87	30685	-2885.6	30820	-5.3723	0	3	43.76	313	1			5011.87	19971	-728.19	19984	-2.0882	0	3	43.76	313	1			5011.87	13640	-176.54	13641	-0.74153	0	3	43.88	313	1
3981.07	30608	-2025.7	30675	-3.7864	0	3	44.76	313	1			3981.07	19750	-467.61	19756	-1.3563	0	3	44.76	313	1			3981.07	13540	-136.34	13541	-0.57692	0	3	44.88	313	1
3162.28	30442	-1347.3	30472	-2.5341	0	3	45.76	313	1			3162.28	19576	-330.49	19579	-0.9672	0	3	45.76	313	1			3162.28	13451	-136.37	13452	-0.58086	0	3	45.88	313	1
2511.89	30230	-924.81	30244	-1.7523	0	3	46.76	313	1			2511.89	19465	-284.28	19467	-0.83673	0	3	46.76	313	1			2511.89	13415	-172.84	13416	-0.73816	0	3	46.88	313	1
1995.26	30000	-682.06	30008	-1.3024	0	3	47.76	313	1			1995.26	19355	-300.98	19357	-0.89091	0	3	47.76	313	1			1995.26	13413	-215.05	13415	-0.91854	0	3	47.88	313	1
1584.89	29809	-632.63	29816	-1.2158	0	3	48.76	313	1			1584.89	19346	-338.81	19349	-1.0033	0	3	48.76	313	1			1584.89	13439	-270.99	13442	-1.1552	0	3	48.88	313	1
1258.92	29720	-606.09	29726	-1.1683	0	3	49.89	313	1			1258.92	19331	-413.51	19335	-1.2254	0	3	49.76	313	1			1258.92	13471	-320.96	13475	-1.3649	0	3	49.88	313	1
1000	29722	-719.09	29731	-1.3859	0	3	51.01	313	1			1000	19401	-480.18	19407	-1.4178	0	3	50.89	313	1			1000	13523	-361.8	13528	-1.5325	0	3	51.01	313	1
794.328	29744	-746.42	29753	-1.4375	0	3	52.01	313	1			794.328	19470	-553.07	19478	-1.6271	0	3	51.89	313	1			794.328	13591	-411.55	13597	-1.7344	0	3	52.01	313	1
630.957	29775	-897.25	29789	-1.726	0	3	53.01	313	1			630.957	19586	-634.99	19596	-1.8569	0	3	53.01	313	1			630.957	13648	-443.2	13655	-1.8599	0	3	53.01	313	1
501.187	29939	-1024	29957	-1.9589	0	3	54.01	313	1			501.187	19668	-693.08	19680	-2.0182	0	3	54.01	313	1			501.187	13724	-482.97	13732	-2.0155	0	3	54.13	313	1
398.107	30121	-1087.7	30141	-2.0681	0	3	55.14	313	1			398.107	19817	-748.25	19831	-2.1623	0	3	55.14	313	1			398.107	13813	-514.15	13823	-2.1317	0	3	55.26	313	1
316.228	30266	-1182.7	30289	-2.2378	0	3	56.26	313	1			316.228	19918	-788.04	19934	-2.2657	0	3	56.26	313	1			316.228	13887	-549.52	13898	-2.2661	0	3	56.38	313	1
251.189	30632	-1511.1	30669	-2.8242	0	3	59.01	313	1			251.189	20183	-797.2	20199	-2.2619	0	3	59.01	313	1			251.189	14064	-585.59	14076	-2.3843	0	3	59.13	313	1
199.526	30674	-1357.4	30704	-2.5338	0	3	60.01	313	1			199.526	20217	-868.49	20236	-2.4598	0	3	60.01	313	1			199.526	14101	-594.13	14114	-2.4127	0	3	60.13	313	1
158.489	31023	-1475.2	31058	-2.7225	0	3	61.01	313	1			158.489	20285	-918.05	20306	-2.5913	0	3	61.01	313	1			158.489	14161	-629.05	14175	-2.5435	0	3	61.13	313	1
125.892	31118	-1475.2	31153	-2.7142	0	3	62.01	313	1			125.892	20484	-943.45	20506	-2.6371	0	3	62.01	313	1			125.892	14298	-638.63	14312	-2.5575	0	3	62.13	313	1
100	31313	-1560.3	31352	-2.8526	0	3	63.01	313	1			100	20660	-1001.7	20684	-2.7758	0	3	63.01	313	1			100	14434	-668	14449	-2.6497	0	3	63.13	313	1
79.4328	31547	-1583.9	31587	-2.8743	0	3	64.01	313	1			79.4328	20775	-1015.2	20800	-2.7976	0	3	64.01	313	1			79.4328	14516	-690.89	14532	-2.7249	0	3	64.13	313	1
63.0957	31912	-1800	31963	-3.2284	0	3	65.01	313	1			63.0957	21013	-1110	21042	-3.0238	0	3	65.01	313	1			63.0957	14685	-704.78	14702	-2.7477	0	3	65.13	313	1
50.1187	34020	-2527.3	34114	-4.2486	0	3	66.01	313	1			50.1187	21950	-1608.9	22009	-4.1922	0	3	66.01	313	1			50.1187	15184	-406.99	15189	-1.5354	0	3	66.13	313	1
39.8107	32319	-1813.5	32370	-3.2116	0	3	67.01	313	1			39.8107	21268	-1139.2	21298	-3.0661	0	3	67.01	313	1			39.8107	14864	-742.14	14883	-2.8583	0	3	67.13	313	1
31.6228	32523	-1869.9	32577	-3.2906	0	3	68.01	313	1			31.6228	21423	-1145.2	21454	-3.0599	0	3	68.01	313	1			31.6228	14977	-766.08	14997	-2.9282	0	3	68.13	313	1
25.1189	32808	-1866.2	32861	-3.2556	0	3	69.01	313	1			25.1189	21595	-1175	21627	-3.1144	0	3	69.14	313	1			25.1189	15096	-780.84	15116	-2.961	0	3	69.26	313	1
19.9526	33064	-1909.7	33119	-3.3056	0	3	70.01	313	1			19.9526	21775	-1196.4	21808	-3.1449	0	3	70.14	313	1			19.9526	15217	-799.72	15238	-3.0084	0	3	70.26	313	1
15.8489	33311	-1984.1	33370	-3.4087	0	3	71.14	313	1			15.8489	21945	-1286.6	21983	-3.3553	0	3	71.14	313	1			15.8489	15335	-809.32	15356	-3.021	0	3	71.38	313	1
12.5892	33656	-2084.7	33721	-3.5445	0	3	72.26	313	1			12.5892	22142	-1244.9	22177	-3.218	0	3	72.14	313	1			12.5892	15466	-846.61	15489	-3.1332	0	3	72.51	313	1
10	33983	-2103.6	34048	-3.5422	0	3	73.26	313	1			10	22325	-1301.1	22363	-3.3354	0	3	73.14	313	1			10	15592	-872.32	15616	-3.2022	0	3	73.51	313	1
7.94328	34332	-2049.5	34393	-3.4163	0	3	74.39	313	1			7.94328	22534	-1298.4	22571	-3.2977	0	3	74.26	313	1			7.94328	15716	-912.72	15742	-3.3238	0	3	74.63	313	1
6.30957	34633	-2202.1	34703	-3.6382	0	3	75.51	313	1			6.30957	22722	-1351.3	22762	-3.4034	0	3	75.39	313	1			6.30957	15851	-907.69	15877	-3.2774	0	3	75.76	313	1
5.01187	34962	-2277.8	35036	-3.7276	0	3	76.64	313	1			5.01187	22922	-1411.7	22965	-3.5242	0	3	76.51	313	1			5.01187	15983	-945.86	16011	-3.3868	0	3	76.88	313	1
3.98107	35319	-2476.9	35406	-4.0116	0	3	77.76	313	1			3.98107	23134	-1511	23183	-3.737	0	3	77.64	313	1			3.98107	16137	-941.6	16164	-3.3394	0	3	77.88	313	1
3.16228	35684	-2472.5	35770	-3.9636	0	3	79.14	313	1			3.16228	23377	-1479.7	23424	-3.6218	0	3	78.76	313	1			3.16228	16281	-989.81	16311	-3.479	0	3	79.13	313	1
2.51189	35997	-2479.5	36082	-3.9404	0	3	80.64	313	1			2.51189	23598	-1551.7	23649	-3.7621	0	3	80.26	313	1			2.51189	16428	-1037.6	16461	-3.614	0	3	80.51	313	1
1.99526	36405	-2527.8	36493	-3.972	0	3	81.89	313	1			1.99526	23828	-1590.7	23881	-3.8193	0	3	81.51	313	1			1.99526	16593	-1060.3	16627	-3.6563	0	3	81.76	313	1
1.58489	36688	-2616.8	36781	-4.0798	0	3	83.26	313	1			1.58489	24087	-1654.2	24144	-3.9287	0	3	82.89	313	1			1.58489	16750	-1101	16786	-3.7607	0	3	83.13	313	1
1.25893	37071	-2771.2	37174	-4.2751	0	3	84.89	313	1			1.25893	24344	-1717.1	24404	-4.0347	0	3	84.51	313	1			1.25893	16932	-1138	16970	-3.8451	0	3	84.76	313	1
1	37445	-2829.6	37552	-4.3214	0	3	86.64	313	1			1	24578	-1751.9	24640	-4.0771	0	3	86.26	313	1			1	17108	-1186.3	17149	-3.9666	0	3	86.51	313	1
0.79433	37847	-2910.1	37959	-4.3969	0	3	89.01	313	1			0.79433	24851	-1826.4	24918	-4.2033	0	3	88.39	313	1			0.79433	17293	-1193.7	17334	-3.9487	0	3	88.51	313	1
0.63096	38280	-2985.6	38396	-4.4597	0	3	91.76	313	1			0.63096	25058	-1877.6	25128	-4.2852	0	3	91.26	313	1			0.63096	17482	-1244.6	17526	-4.0722	0	3	91.76	313	1
0.50119	38676	-3089.6	38799	-4.5673	0	3	94.89	313	1			0.50119	25344	-1944	25418	-4.3863	0	3	94.39	313	1			0.50119	17682	-1298	17730	-4.1984	0	3	94.76	313	1
0.39811	39134	-3237.5	39268	-4.7292	0	3	98.51	313	1			0.39811	25616	-2041.5	25697	-4.5566	0	3	98.01	313	1			0.39811	17872	-1333.4	17922	-4.2668	0	3	98.38	313	1
0.31623	39673	-3352.1	39814	-4.8296	0	3	103.14	313	1			0.31623	25825	-2051.1	25906	-4.5411	0	3	102.01	313	1			0.31623	18066	-1367	18118	-4.3272	0	3	102.38	313	1
0.25119	40039	-3373.3	40181	-4.8158	0	3	108.89	313	1			0.25119	26141	-2159.8	26230	-4.7231	0	3	106.76	313	1			0.25119	18247	-1439	18304	-4.5091	0	3	107.13	313	1
0.19953	40432	-3495.2	40583	-4.9407	0	3	116.26	313	1			0.19953	26457	-2153.7	26545	-4.6538	0	3	112.51	313	1			0.19953	18467	-1456.4	18524	-4.5093	0	3	113.01	313	1
0.15849	40911	-3626.5	41071	-5.0657	0	3	123.39	313	1			0.15849	26833	-2309.9	26932	-4.9201	0	3	120.39	313	1			0.15849	18727	-1539.7	18790	-4.7002	0	3	120.76	313	1
0.12589	41485	-3867.1	41665	-5.3255	0	3	134.01	313	1			0.12589	27091	-2369.5	27194	-4.9986	0	3	129.14	313	1			0.12589	18926	-1599.1	18993	-4.8296	0	3	129.51	313	1
0.1	42011	-4013.6	42202	-5.4573	0	3	144.89	313	1			0.1	27465	-2431	27572	-5.0582	0	3	139.89	313	1			0.1	19199	-1607.5	19266	-4.7861	0	3	140.38	313	1
1073 K
Frequency	Z' (a)	Z'' (b)	Magnitude	Phase	Bias	Ampl	Time	Range	Error
10000000	2.6522	-24.675	24.817	-83.865	0	3	2.88	315	0
7943282	-41.782	10.91	43.183	165.37	0	3	3.88	315	0
6309574	-42.908	121.09	128.47	109.51	0	3	7.63	315	0
5011873	222.25	-279.91	357.41	-51.55	0	3	8.63	314	0
3981072	159.7	-428.46	457.25	-69.558	0	3	9.64	314	1
3162278	150.4	-527.78	548.79	-74.094	0	3	10.63	314	1
2511887	161.96	-642.25	662.36	-75.846	0	3	11.63	314	1
1995262	169.43	-785.91	803.97	-77.834	0	3	12.63	314	1
1584893	147.39	-947.3	958.7	-81.156	0	3	13.63	314	1
1258925	271.02	-1313.5	1341.2	-78.342	0	3	14.63	314	1
1000000	406.23	-1576.7	1628.2	-75.552	0	3	15.63	314	1
794328	569.35	-1910.4	1993.4	-73.405	0	3	16.76	314	1
630957	796.82	-2302.4	2436.4	-70.91	0	3	19.51	314	1
501187	1114	-2751.6	2968.6	-67.959	0	3	20.63	314	1
398107	1557.5	-3232.2	3587.9	-64.272	0	3	21.63	313	1
316228	2148.4	-3712	4288.9	-59.939	0	3	22.63	313	1
251189	2887.6	-4149.8	5055.6	-55.168	0	3	23.63	313	1
199526	3776.9	-4468.5	5850.9	-49.795	0	3	24.63	313	1
158489	4774.5	-4639.9	6657.7	-44.181	0	3	25.63	313	1
125892	5803.3	-4602.6	7406.9	-38.418	0	3	26.63	313	1
100000	6784.6	-4377.6	8074.3	-32.831	0	3	27.63	313	1
79432.8	7664.8	-3974.1	8633.8	-27.406	0	3	28.63	313	1
63095.7	8368.3	-3481.4	9063.6	-22.588	0	3	32.88	313	1
50118.7	8911.9	-2926	9379.9	-18.176	0	3	33.88	313	1
39810.7	9280.2	-2417.5	9589.9	-14.601	0	3	34.88	313	1
31622.8	9574	-1868.2	9754.6	-11.042	0	3	35.88	313	1
25118.9	9717.4	-1383.6	9815.4	-8.1035	0	3	36.88	313	1
19952.6	9754.7	-953.35	9801.2	-5.5819	0	3	37.88	313	1
15848.9	9735.8	-618.99	9755.5	-3.6379	0	3	38.88	313	1
12589.2	9644	-367.56	9651	-2.1826	0	3	39.89	313	1
10000	9532.4	-191.34	9534.3	-1.1499	0	3	40.88	313	1
7943.28	9433.8	-95.592	9434.3	-0.58055	0	3	41.88	313	1
6309.57	9345.2	-43.049	9345.3	-0.26393	0	3	42.88	313	1
5011.87	9284.3	-43.419	9284.4	-0.26795	0	3	43.88	313	1
3981.07	9250.1	-66.476	9250.3	-0.41175	0	3	44.88	313	1
3162.28	9231	-91.326	9231.5	-0.56683	0	3	45.88	313	1
2511.89	9238	-131.47	9238.9	-0.81535	0	3	46.88	313	1
1995.26	9249.5	-166.07	9251	-1.0286	0	3	47.88	313	1
1584.89	9279.2	-201.58	9281.4	-1.2445	0	3	48.88	313	1
1258.92	9314.6	-232.27	9317.5	-1.4284	0	3	50.01	313	1
1000	9360.4	-260.01	9364	-1.5911	0	3	51.13	313	1
794.328	9408.1	-287.94	9412.5	-1.753	0	3	52.13	313	1
630.957	9452.8	-306.97	9457.8	-1.86	0	3	53.26	313	1
501.187	9505.9	-323.38	9511.4	-1.9484	0	3	54.38	313	1
398.107	9565.1	-345.23	9571.3	-2.0671	0	3	55.51	313	1
316.228	9623.8	-362.68	9630.6	-2.1582	0	3	56.63	313	1
251.189	9715.6	-383.19	9723.2	-2.2586	0	3	59.38	313	1
199.526	9757.1	-389.38	9764.9	-2.2853	0	3	60.38	313	1
158.489	9799.5	-398.43	9807.6	-2.3283	0	3	61.38	313	1
125.892	9888.3	-418.38	9897.1	-2.4228	0	3	62.38	313	1
100	9965.7	-447.96	9975.8	-2.5737	0	3	63.38	313	1
79.4328	10026	-443.69	10036	-2.5339	0	3	64.38	313	1
63.0957	10113	-481.01	10124	-2.7231	0	3	65.39	313	1
50.1187	10336	-731.31	10362	-4.0471	0	3	66.38	313	1
39.8107	10255	-485.71	10266	-2.7117	0	3	67.38	313	1
31.6228	10321	-495.92	10333	-2.7509	0	3	68.38	313	1
25.1189	10401	-509.37	10413	-2.8037	0	3	69.38	313	1
19.9526	10482	-522	10495	-2.851	0	3	70.38	313	1
15.8489	10556	-539.09	10570	-2.9235	0	3	71.38	313	1
12.5892	10645	-551.27	10659	-2.9645	0	3	72.38	313	1
10	10730	-567.41	10745	-3.027	0	3	73.38	313	1
7.94328	10822	-595.99	10838	-3.1522	0	3	74.51	313	1
6.30957	10911	-599.09	10927	-3.1428	0	3	75.63	313	1
5.01187	11003	-616.92	11020	-3.2091	0	3	76.76	313	1
3.98107	11095	-617.53	11112	-3.1857	0	3	77.88	313	1
3.16228	11195	-653.43	11214	-3.3405	0	3	79.01	313	1
2.51189	11285	-670.59	11305	-3.4007	0	3	80.51	313	1
1.99526	11382	-692.27	11403	-3.4805	0	3	81.76	313	1
1.58489	11491	-713.86	11513	-3.5548	0	3	83.13	313	1
1.25893	11590	-736.44	11613	-3.6357	0	3	84.76	313	1
1	11711	-757.14	11735	-3.6991	0	3	86.51	313	1
0.79433	11840	-783.74	11866	-3.7871	0	3	88.63	313	1
0.63096	11943	-808.5	11970	-3.8728	0	3	91.51	313	1
0.50119	12080	-830.23	12108	-3.9316	0	3	94.26	313	1
0.39811	12197	-857.65	12227	-4.0222	0	3	97.51	313	1
0.31623	12357	-897.75	12390	-4.1553	0	3	101.51	313	1
0.25119	12478	-918.46	12512	-4.2097	0	3	106.26	313	1
0.19953	12652	-971.32	12689	-4.3901	0	3	112.26	313	1
0.15849	12779	-1001.6	12818	-4.4816	0	3	119.38	313	1
0.12589	12941	-1023.7	12981	-4.523	0	3	128.13	313	1
0.1	13167	-1067.4	13210	-4.6346	0	3	138.88	313	1
