# Supplementary material for: Effect of chemical composition on the electrical conductivity of gneiss at high temperatures and pressures
Source: Copernicus journal article supplement (doi:10.5194/se-9-233-2018), 2018-03-06
Supplement: Supplementary file [file se-9-233-2018-supplement-title-page.pdf › se-9-233-2018-supplement-title-page.pdf]

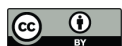

## *Supplement of*

# **Effect of chemical composition on the electrical conductivity of gneiss at high temperatures and pressures**

**Lidong Dai et al.**

*Correspondence to:* Lidong Dai ([dailidong@vip.gyig.ac.cn](mailto:dailidong@vip.gyig.ac.cn))

- [se-9-233-2018-supplement-title-page.pdf](#)
- Supplemental Materials
  - [Supplemental data.xlsx](#)

The copyright of individual parts of the supplement might differ from the CC BY 4.0 License.
